# Supplementary material for: Chronological and Skeletal Age in Relation to Physical Fitness Performance in Preschool Children
Source: PubMed Central journal article supplement (PMC8160222; doi:10.3389/fped.2021.641353), 2021-05-14
Supplement: Table_1.pdf [file Table_1.pdf]

**SUPPLEMENTARY TABLE 1.** Descriptive statistics for body size, physical fitness by gender and skeletal age

|                        | N   | Body size               |                        | Health-related physical fitness |                        | Skill-related physical fitness |                         |                       |                           |                       |
|------------------------|-----|-------------------------|------------------------|---------------------------------|------------------------|--------------------------------|-------------------------|-----------------------|---------------------------|-----------------------|
|                        |     | Height (cm)             | Weight (kg)            | BMI (kg/m <sup>2</sup> )        | Sit and reach (cm)     | 2×10 m SRT (s)                 | Standing long jump (cm) | Tennis ball throw (m) | 5 m jump on both feet (s) | Balance beam walk (s) |
| <b>Male (n =509)</b>   |     |                         |                        |                                 |                        |                                |                         |                       |                           |                       |
| ~ < 3.0                | 42  | 99.8±4.8                | 16.1±1.7               | 16.1±1.1                        | 10.5±4.1               | 11.0±2.2                       | 58.5±16.6               | 2.8±1.3               | 9.4±4.3                   | 26.0±15.7             |
| 3.0 ~ < 3.5            | 44  | 102.6±4.0               | 17.2±1.8               | 16.3±1.4                        | 9.4±3.9                | 10.6±2.2                       | 62.2±16.9               | 3.5±1.2               | 8.2±3.1                   | 24.7±13.6             |
| 3.5 ~ < 4.0            | 55  | 105.6±5.4               | 18.3±2.6               | 16.4±1.6                        | 8.3±4.1                | 9.8±2.4                        | 73.1±23.5               | 3.7±1.6               | 7.9±4.2                   | 24.1±16.4             |
| 4.0 ~ < 4.5            | 88  | 108.2±5.2               | 18.9±2.6               | 16.1±1.8                        | 9.2±4.8                | 9.3±2.6                        | 79.1±23.2               | 4.0±1.6               | 7.4±3.2                   | 16.5±12.6             |
| 4.5 ~ < 5.0            | 104 | 111.1±4.6               | 20.0±2.7               | 16.2±1.5                        | 8.2±5.0                | 8.5±1.4                        | 84.9±19.5               | 4.6±1.9               | 7.0±3.0                   | 17.5±13.3             |
| 5.0 ~ < 5.5            | 77  | 114.0±5.1               | 21.1±3.1               | 16.2±1.5                        | 7.7±4.6                | 8.5±1.6                        | 90.6±17.2               | 4.7±2.0               | 6.5±2.8                   | 14.4±10.8             |
| 5.5 ~ < 6.0            | 49  | 116.0±4.3               | 22.2±3.5               | 16.5±2.5                        | 6.3±4.8                | 8.2±1.1                        | 93.7±14.9               | 4.9±1.7               | 5.7±1.1                   | 16.2±13.1             |
| 6.0 ~ < 6.5            | 32  | 117.0±5.6               | 23.0±4.1               | 16.7±2.2                        | 7.8±5.1                | 8.3±1.3                        | 93.2±17.2               | 5.1±1.8               | 6.2±2.0                   | 14.6±10.5             |
| 6.5 ~ <                | 18  | 112.0±5.9               | 24.9±5.8               | 17.2±2.7                        | 7.8±5.4                | 7.9±1.1                        | 95.4±19.8               | 6.1±2.0               | 5.7±1.3                   | 14.8±13.6             |
| One-way ANOVA          |     | **                      | **                     | ns                              | **                     | **                             | **                      | **                    | **                        | **                    |
| <b>Female (n =436)</b> |     |                         |                        |                                 |                        |                                |                         |                       |                           |                       |
| ~ < 3.0                | 11  | 97.5±4.1                | 14.5±1.1 <sup>##</sup> | 15.3±1.1 <sup>#</sup>           | 10.5±3.1               | 11.7±1.8                       | 50.2±14.5               | 2.0±0.4               | 9.6±3.7                   | 22.5±14.5             |
| 3.0 ~ < 3.5            | 63  | 100.5±4.5               | 15.8±1.7 <sup>##</sup> | 15.7±1.3 <sup>#</sup>           | 10.7±3.3 <sup>#</sup>  | 11.0±2.1                       | 56.9±19.7               | 2.7±0.9 <sup>##</sup> | 8.2±3.5                   | 24.6±14.3             |
| 3.5 ~ < 4.0            | 89  | 106.8±5.8               | 18.1±2.3               | 15.8±1.5 <sup>#</sup>           | 12.0±3.6 <sup>##</sup> | 9.4±1.6                        | 75.2±17.7               | 3.7±1.4               | 7.0±2.3                   | 20.3±14.2             |
| 4.0 ~ < 4.5            | 63  | 107.6±5.6               | 17.8±2.3 <sup>##</sup> | 15.3±1.3 <sup>##</sup>          | 11.7±3.8 <sup>##</sup> | 9.7±2.0                        | 75.1±16.6               | 3.5±1.3 <sup>#</sup>  | 7.1±1.8                   | 18.6±12.5             |
| 4.5 ~ < 5.0            | 60  | 111.3±5.7               | 19.7±2.9               | 15.9±1.5                        | 12.4±4.5 <sup>##</sup> | 8.8±1.3                        | 78.2±13.5 <sup>#</sup>  | 4.0±1.3 <sup>#</sup>  | 6.3±1.5                   | 16.5±13.0             |
| 5.0 ~ < 5.5            | 62  | 112.8±5.3               | 20.5±3.1               | 16.1±1.9                        | 10.7±4.8 <sup>##</sup> | 8.7±1.2                        | 84.0±16.1 <sup>#</sup>  | 4.3±1.6               | 6.3±2.1                   | 15.9±12.5             |
| 5.5 ~ < 6.0            | 47  | 112.1±4.9 <sup>##</sup> | 20.6±3.3 <sup>#</sup>  | 16.4±2.5                        | 11.8±4.7 <sup>##</sup> | 8.6±1.2                        | 87.7±18.8               | 4.2±1.3 <sup>#</sup>  | 6.5±2.0 <sup>#</sup>      | 15.1±13.3             |
| 6.0 ~ < 6.5            | 18  | 117.0±5.0               | 21.6±3.5               | 15.8±2.4                        | 9.5±4.2                | 8.2±0.6                        | 85.8±12.1               | 4.4±0.8               | 7.2±4.0                   | 15.3±9.4              |
| 6.5 ~ <                | 23  | 117.8±4.2               | 23.0±3.9               | 16.5±2.7                        | 11.3±4.1 <sup>#</sup>  | 8.2±0.7                        | 87.3±15.3               | 4.7±1.3 <sup>##</sup> | 6.2±1.6                   | 14.4±10.9             |
| One-way ANOVA          |     | **                      | **                     | *                               | ns                     | **                             | **                      | **                    | **                        | **                    |

\*  $p < 0.05$ , \*\*  $P < 0.01$ . <sup>#</sup>Female vs. Male,  $p < 0.05$ , <sup>##</sup>Female vs. Male,  $p < 0.01$ .

BMI: body mass index; SRT: shuttle run test; ns: no significance.
